# Supplementary material for: The Promising Potential of Triploidy in Date Palm (Phoenix dactylifera L.) Breeding
Source: MDPI journal article supplement (doi:10.3390/plants13060815), 2024-03-12
Supplement: s1 [file s1]

# Supplementary material

**Table S1.** Mean values of selected morphological variables of the diploid ('Deglet Nour': T0) and triploid genotypes (T1, T2, T3 and T4) Lp: Length of the palm; Tr: Thickness of the rachis; Wp: Width of the palm at the base of the petiole; Nsp: Number of spines; Tsp: Max. thickness of the spines; Lsp: Maximum length of spines; Nlf: Number of leaflets; Wsp: Maximum width of spines in midleaf; Lsm: Max. length of spines in the middle of the palm; Las: Length of the apical spine; Was: Width of the apical spine. Values followed by different letters denote statistically significant differences (Student–Newman–Keuls (S-N-K),  $p \leq 0.05$ ).

| Crown  | Cultivar | Lp         | Tr          | Wp           | Nsp         | Tsp          | Lsp         | Nlf          | Wsp         | Lsm          | Las          | Was         |
|--------|----------|------------|-------------|--------------|-------------|--------------|-------------|--------------|-------------|--------------|--------------|-------------|
| All    | T0       | 2.54±0.18c | 2.67±0.20b  | 9.91±0.43bc  | 34.22±3.27a | 0.751±0.03b  | 21.05±1.51b | 92.88±7.91d  | 2.552±0.05b | 39.93±0.75d  | 26.94±1.04d  | 2.02±0.04c  |
|        | T1       | 2.39±0.08c | 3.51±0.46a  | 9.144±1.27c  | 14.22±1.48c | 0.477±0.06c  | 26.60±1.79a | 74.11±9.86f  | 3.255±0.58a | 56.41±1.55a  | 35.30±2.38b  | 1.95±0.38c  |
|        | T2       | 2.74±0.07b | 3.43±0.61a  | 11.04±0.35b  | 35.22±1.09a | 0.58±0.17c   | 15.36±2.33d | 104.30±6.68c | 2.822±0.38b | 52.48±0.60b  | 32.92±3.20bc | 2.80±0.77b  |
|        | T3       | 2.95±0.30a | 3.16±0.08a  | 9.614±1.16c  | 27.22±3.11b | 0.577±0.04c  | 20.56±0.52b | 132.6±5.85a  | 2.78±0.22b  | 46.93±3.70c  | 31.60±3.73c  | 1.70±0.52c  |
|        | T4       | 3.05±0.10a | 3.50±0.13a  | 10.90±1.54b  | 27.88±1.69b | 0.588±0.07c  | 21.04±0.14b | 125.2±6.77b  | 2.82±0.36b  | 53.38±6.53ab | 34.57±2.09b  | 2.66±0.18b  |
| Base   | T0       | 2.59±0.01c | 2.62±0.03d  | 10.26±0.30d  | 38.00±1.00a | 0.786±0.00b  | 20.76±0.32b | 85.00±1.00d  | 2.56±0.05c  | 40.10±0.10f  | 27.56±0.05d  | 2.03±0.05d  |
|        | T1       | 2.34±0.00d | 4.08±0.17a  | 10.80±0.26c  | 16.00±1.00e | 0.466±0.05d  | 25.66±3.21a | 65.00±2.00f  | 3.63±0.11a  | 56.83±1.60a  | 36.33±1.15b  | 2.446±0.10c |
|        | T2       | 2.78±0.03b | 4.23±0.20a  | 10.90±0.09c  | 35.66±1.52b | 0.806±0.02b  | 14.73±2.66c | 97.66±2.51c  | 2.93±0.05b  | 52.63±0.77b  | 36.83±0.37b  | 3.46±0.13b  |
|        | T3       | 3.06±0.05a | 3.23±0.05c  | 11.10±0.09c  | 28.66±1.15c | 0.533±0.05d  | 20.66±0.41b | 125.60±1.15a | 2.96±0.05b  | 51.16±0.25c  | 36.46±0.55b  | 2.40±0.03c  |
|        | T4       | 3.00±0.09a | 3.59±0.03b  | 12.90±0.26b  | 26.66±0.57d | 0.666±0.05c  | 21.00±0.19b | 118.00±1.00b | 2.96±0.05b  | 45.00±0.60e  | 33.93±0.70c  | 2.48±0.02c  |
| Medium | T0       | 2.71±0.06b | 2.46±0.05c  | 10.03±0.25c  | 34.00±1.00a | 0.76±0.01b   | 22.90±0.26b | 91.00±1.00d  | 2.50±0.00d  | 39.10±0.10e  | 25.56±0.25e  | 2.00±0.00c  |
|        | T1       | 2.33±0.01c | 3.03±0.05b  | 8.13±0.30e   | 13.33±0.57d | 0.533±0.05cd | 27.36±0.55a | 70.66±2.08f  | 3.63±0.20a  | 57.60±0.52a  | 32.33±0.66c  | 1.60±0.1d   |
|        | T2       | 2.78±0.03b | 2.96±0.05b  | 10.93±0.51b  | 35.00±1.00a | 0.50±0.00d   | 17.8±0.19d  | 103.3±3.51c  | 3.20±0.09c  | 52.33±0.75c  | 29.56±0.55d  | 3.16±0.15a  |
|        | T3       | 3.22±0.06a | 3.11±0.10b  | 9.23±0.25d   | 29.66±0.57b | 0.596±0.01c  | 21.03±0.25c | 133.3±0.57a  | 2.496±0.04d | 46.96±0.15d  | 29.56±0.60d  | 1.30±0.01e  |
|        | T4       | 3.15±0.05a | 3.56±0.05a  | 10.27±0.14bc | 30.00±0.00b | 0.593±0.03c  | 21.03±0.05c | 124.6±0.57b  | 3.14±0.05c  | 55.86±1.62b  | 37.16±0.76b  | 2.64±0.07b  |
| Upper  | T0       | 2.33±0.15c | 2.93±0.05bc | 9.433±0.20c  | 30.66±0.57b | 0.706±0.01b  | 19.5±0.36c  | 102.6±2.51d  | 2.59±0.01c  | 40.60±0.69f  | 27.70±0.09c  | 2.03±0.05c  |
|        | T1       | 2.5±0.02bc | 2.43±0.05a  | 8.50±0.26d   | 13.33±0.57e | 0.433±0.05d  | 26.76±0.25a | 86.66±1.52e  | 2.50±0.10c  | 54.80±0.72b  | 37.23±0.77b  | 1.82±0.06c  |
|        | T2       | 2.65±0.04b | 3.10±0.10b  | 11.30±0.26b  | 35.00±1.00a | 0.433±0.05d  | 13.56±0.51e | 112.00±2.00c | 2.33±0.05d  | 52.50±0.45c  | 32.36±0.51b  | 1.79±0.01c  |
|        | T3       | 2.57±0.11b | 3.15±0.05b  | 8.51±0.08d   | 23.33±1.52d | 0.603±0.00c  | 20.00±0.19c | 139.00±1.00a | 2.87±0.05b  | 42.66±0.75e  | 28.76±1.15c  | 1.39±0.01d  |
|        | T4       | 3.00±0.10a | 3.29±0.04b  | 9.526±0.12c  | 27.00±1.00c | 0.506±0.02d  | 21.1±0.17b  | 133.00±3.60b | 2.34±0.05d  | 59.30±0.75a  | 32.63±0.35b  | 2.86±0.15b  |
